# Supplementary material for: Bisthienylethene Th2im and its complex (Th2imH)2[ReCl6]: crystalline-phase photochromism, and photochemical regulation of luminescence and magnetic properties
Source: Royal Society of Chemistry journal article supplement (doi:10.1039/c5dt04678e), 2016-01-01
Supplement: c5dt04678e1.pdf [file c5dt04678e1.pdf]

## Electronic Supporting Information

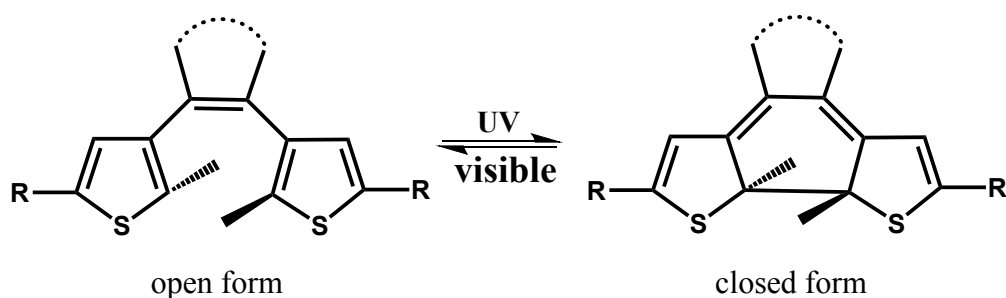

**Scheme S1** Photochromic interconversion of a BTE unit

**Table S1** Solid-state emission data of **1** and **2** before and after irradiation with 365 nm light at room temperature

| Compound                   | $\lambda_{\text{max}}$ (nm) |
|----------------------------|-----------------------------|
| <b>1</b>                   | 433, 448, 482, 531, 570     |
| <b>1</b> after irradiation | 428, 447, 482, 531          |
| <b>2</b>                   | 460, 489, 535, 593          |
| <b>2</b> after irradiation | 460, 486, 535               |

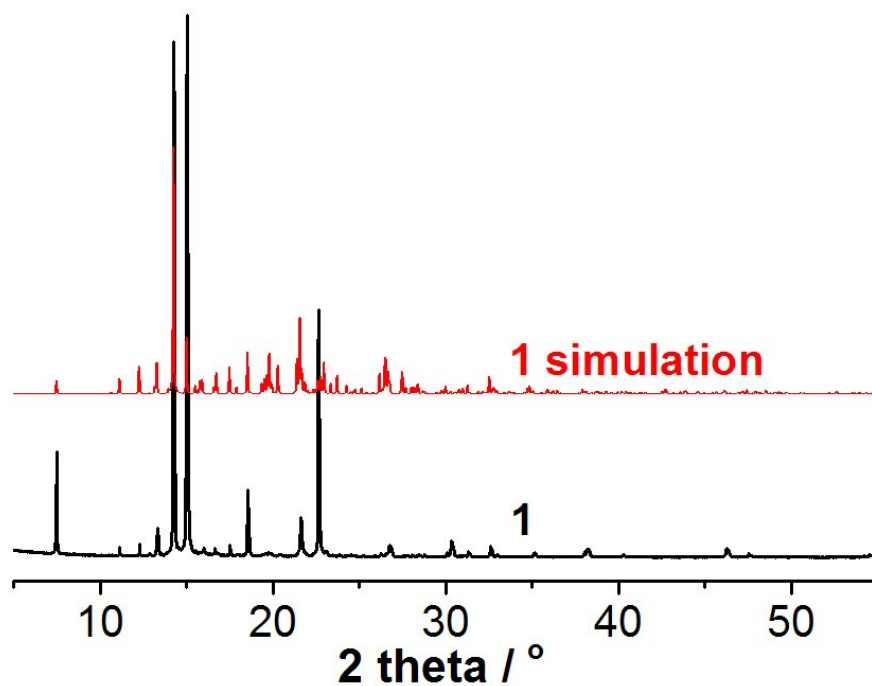

**Fig. S1** Experimental and simulated XRD patterns of **1**

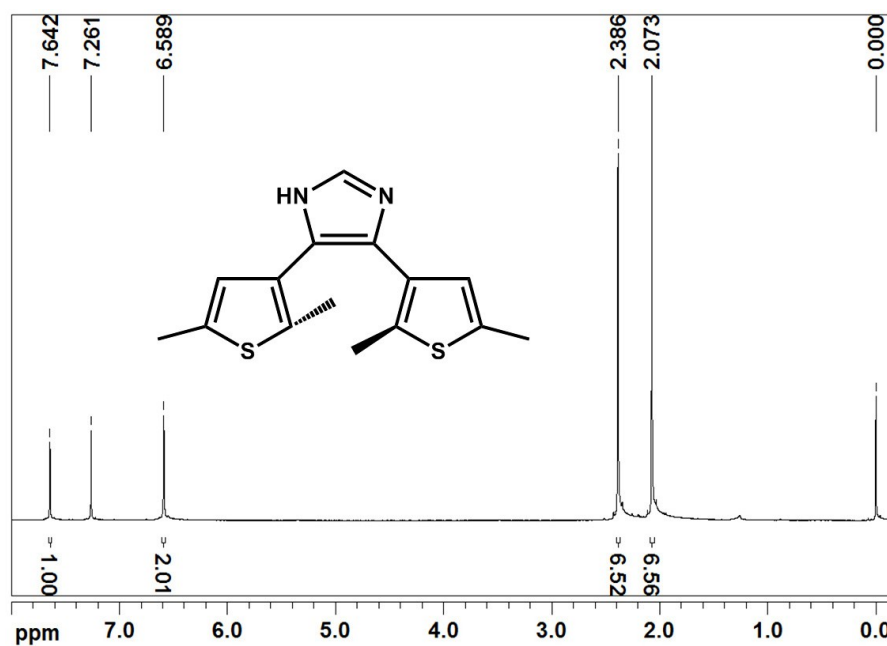

**Fig. S2**  $^1\text{H}$  NMR spectrum of **1** (500 MHz,  $\text{CDCl}_3$ ).

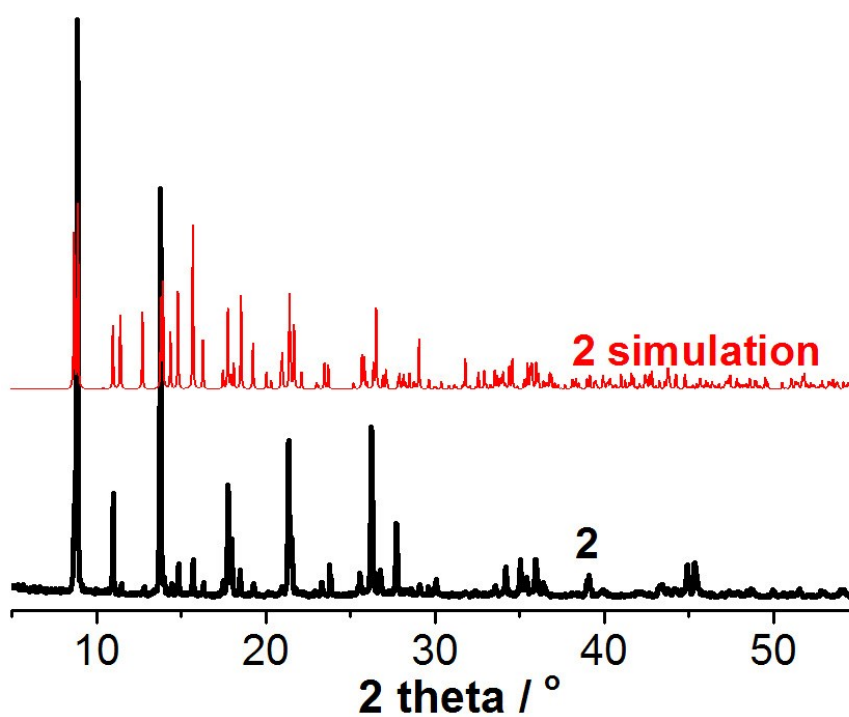

**Fig. S3** Experimental and simulated XRD patterns of **2**.

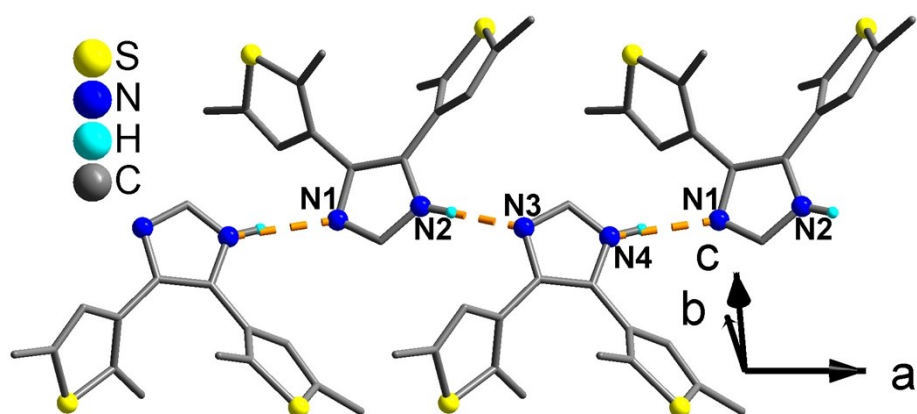

**Fig. S4** The supramolecular chain structure in **1**.

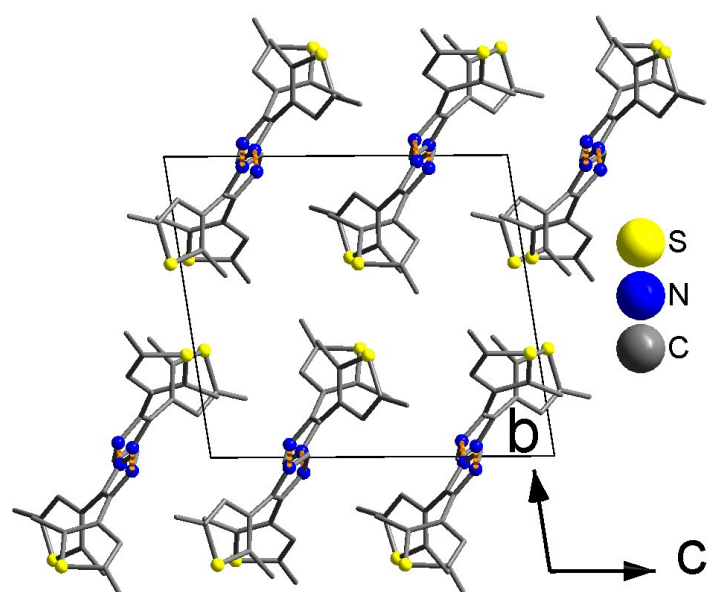

**Fig. S5** The packing structure of **1**.

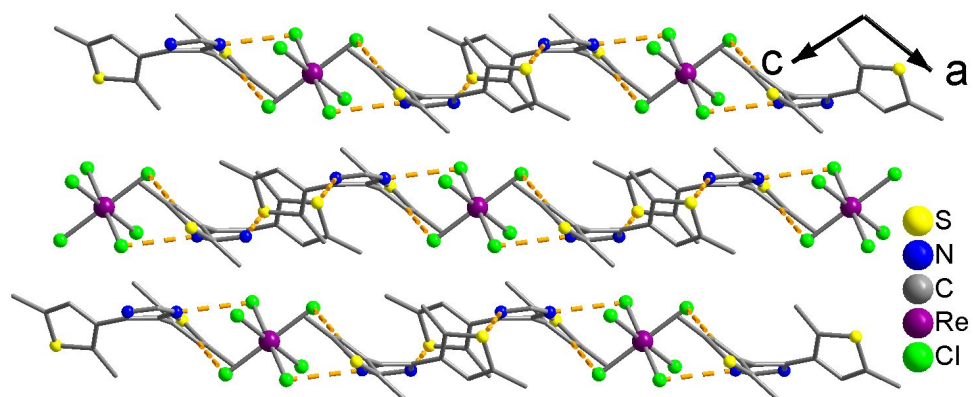

**Fig. S6** The packing structure of **2**.

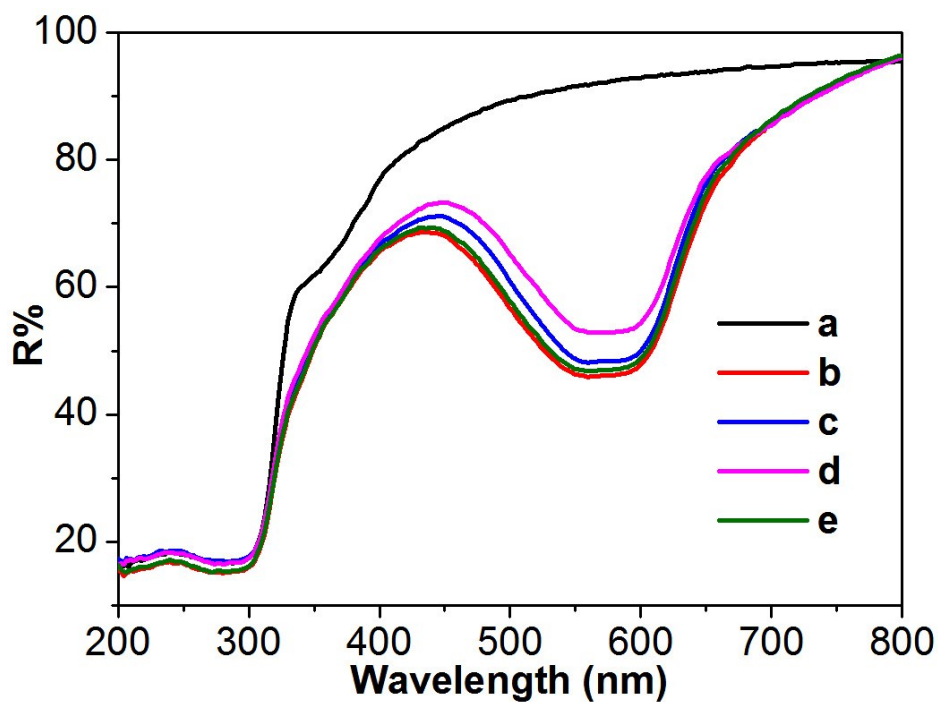

**Fig. S7** Plots a and b: irradiating ( $\lambda = 365$  nm) **1** for 0, 30 minutes, respectively; plots c and d: using 574 nm light to irradiate the sample corresponding to plot b for 10 and 20 minutes, respectively; plot e: placing the sample corresponding to plot b in the dark for 45 minutes.

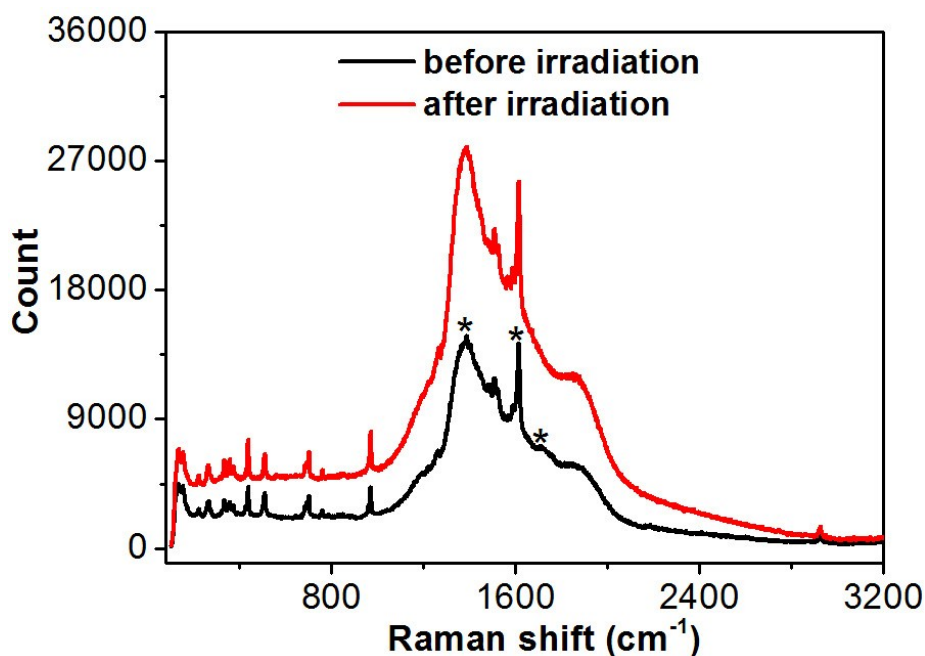

**Fig. S8** Raman spectra of **1** before and after irradiation ( $\lambda = 365$  nm, 30 minutes), using laser light of 785 nm. Three peaks with \* are at 1399, 1614 and 1711  $\text{cm}^{-1}$ , respectively.

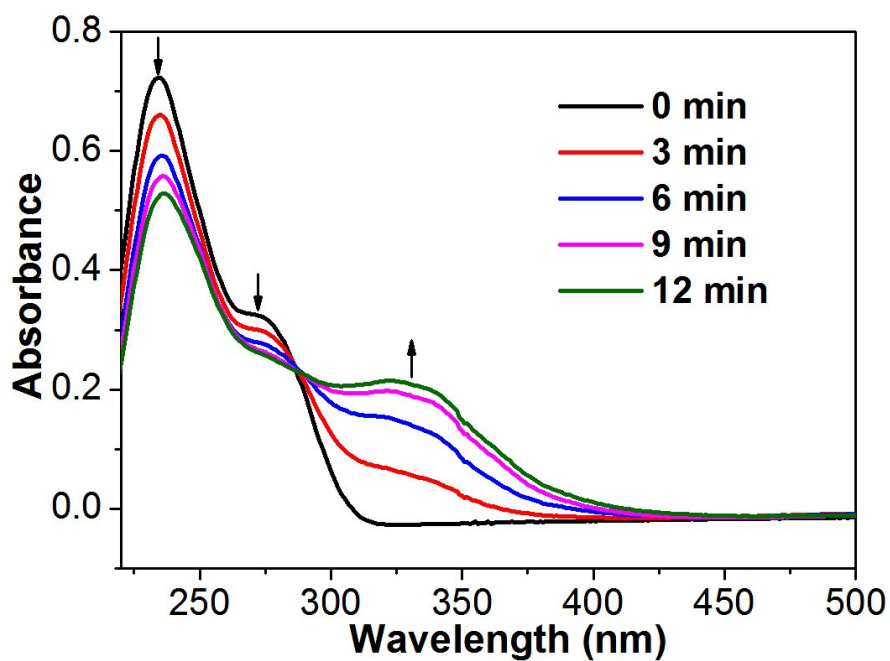

**Fig. S9** Absorption spectra changes of **1** in  $\text{CH}_3\text{CN}$  solution ( $c = 2.4 \times 10^{-5} \text{ M}$ ) upon UV irradiation ( $\lambda = 270 \text{ nm}$ ) for 0 to 12 minutes.

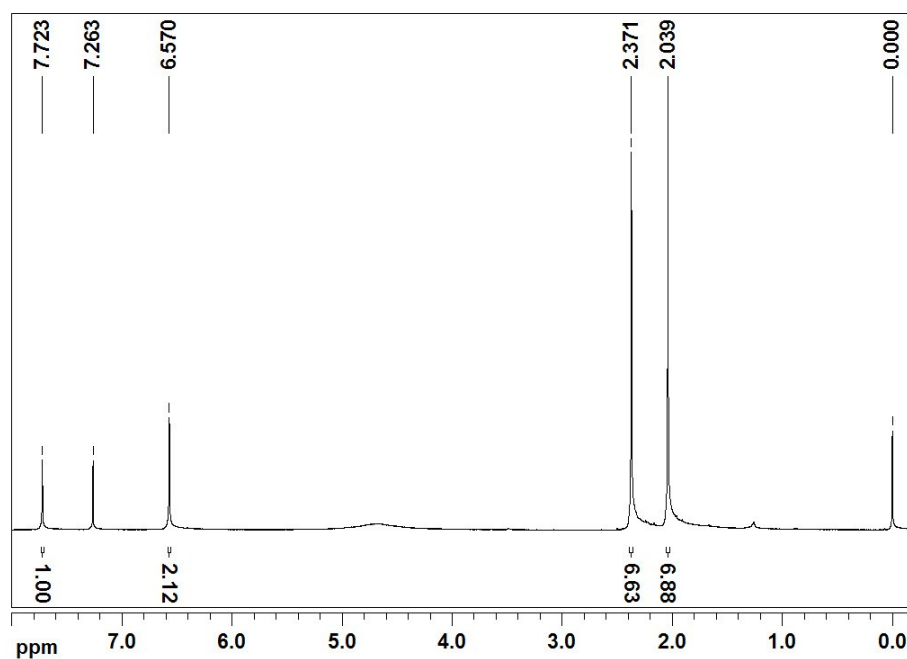

**Fig. S10**  $^1\text{H}$  NMR spectrum of **1** (500 MHz,  $\text{CDCl}_3$ ) after UV irradiation ( $\lambda = 270 \text{ nm}$ ).

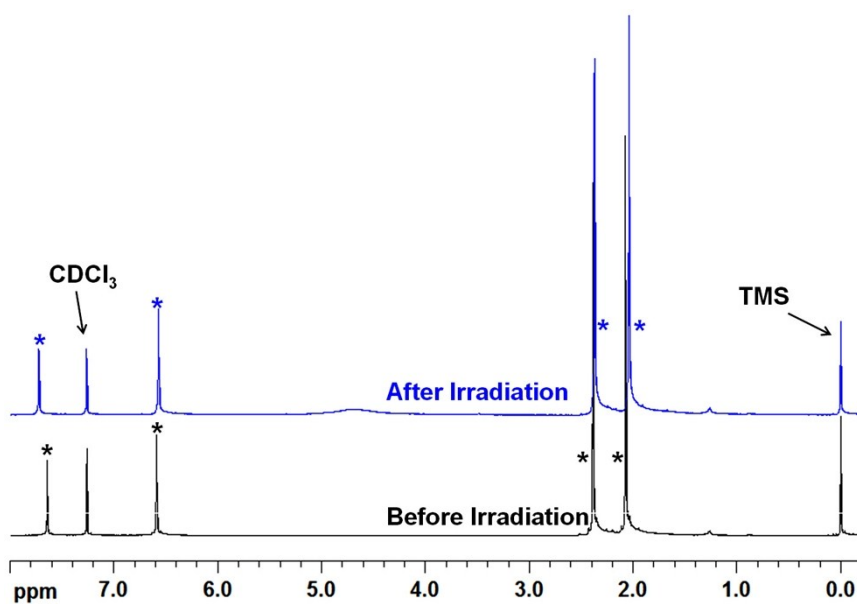

**Fig. S11**  $^1\text{H}$  NMR spectra of **1** before and after UV irradiation ( $\lambda = 270$  nm).

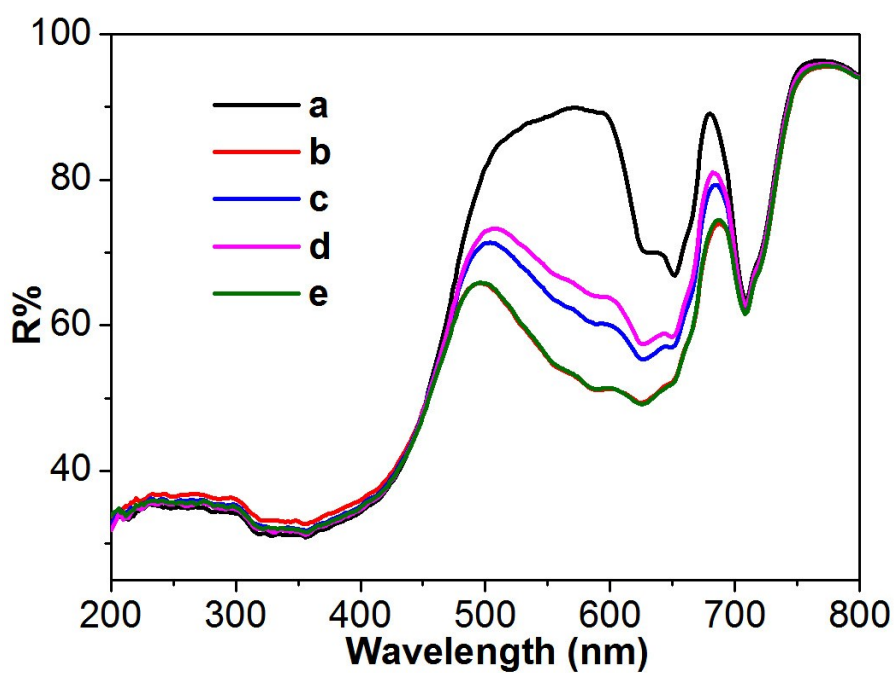

**Fig. S12** Plots a and b: irradiating ( $\lambda = 365$  nm) **2** for 0, 20 minutes, respectively; plots c and d: using 624 nm light to irradiate the sample corresponding to plot b for 10 and 20 minutes, respectively; plot e: placing the sample corresponding to plot b in the dark for 40 minutes.

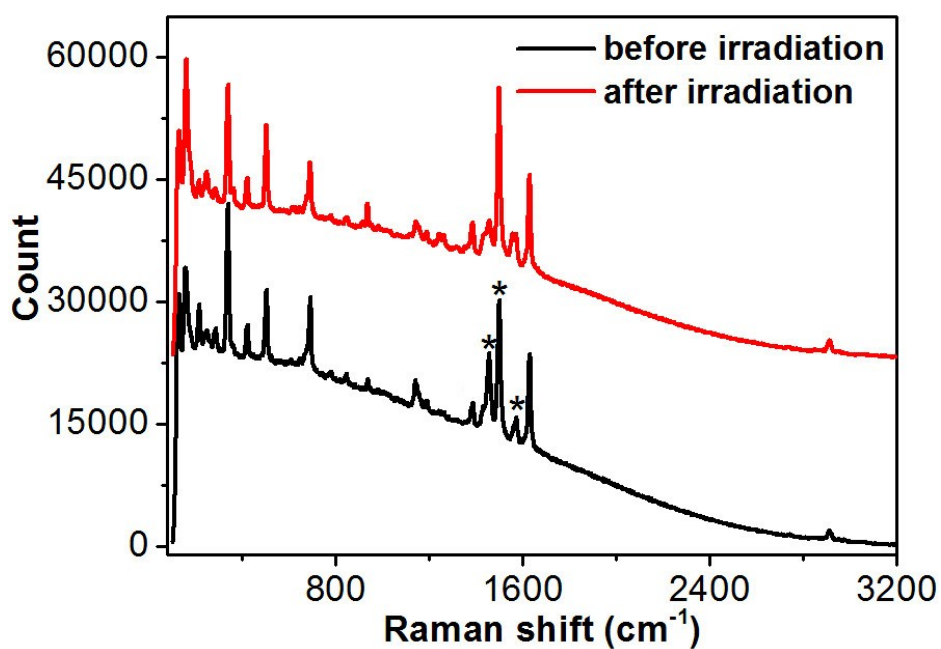

**Fig. S13** Raman spectra of **2** before and after irradiation ( $\lambda = 365$  nm, 20 minutes), using laser light of 785 nm. Three peaks with \* are at 1457, 1500 and 1573  $\text{cm}^{-1}$ , respectively.

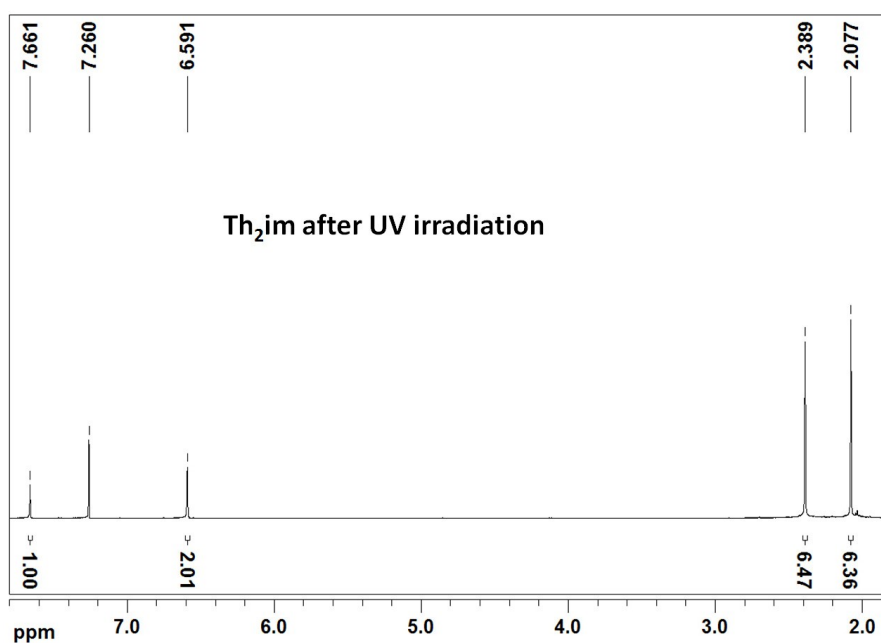

**Fig. S14**  $^1\text{H}$  NMR spectrum of the irradiated sample of **1** (500 MHz,  $\text{CDCl}_3$ ; UV irradiation,  $\lambda = 365$  nm).

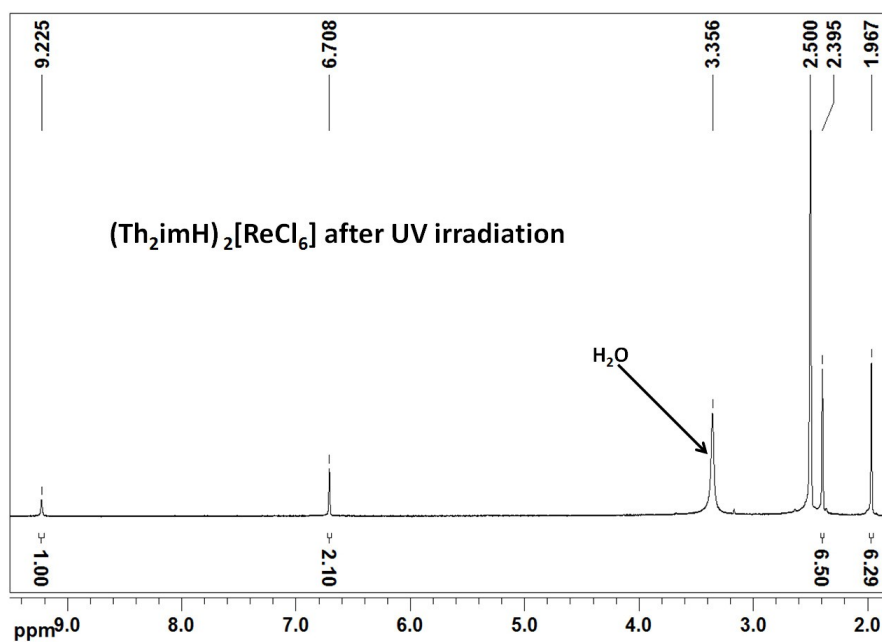

**Fig. S15** <sup>1</sup>H NMR spectrum of the irradiated sample of **2** (500 MHz, DMSO-*d*<sub>6</sub>; UV irradiation,  $\lambda = 365$  nm).

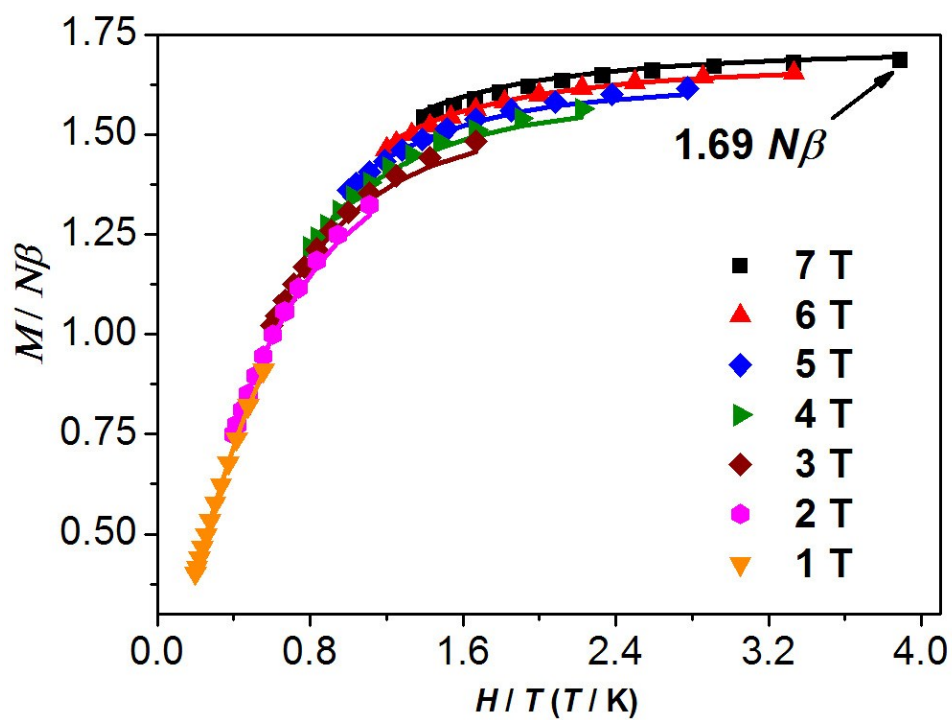

**Fig. S16** Low-temperature magnetization data for **2** collected under various applied dc fields. The solid lines represent fits to the data.

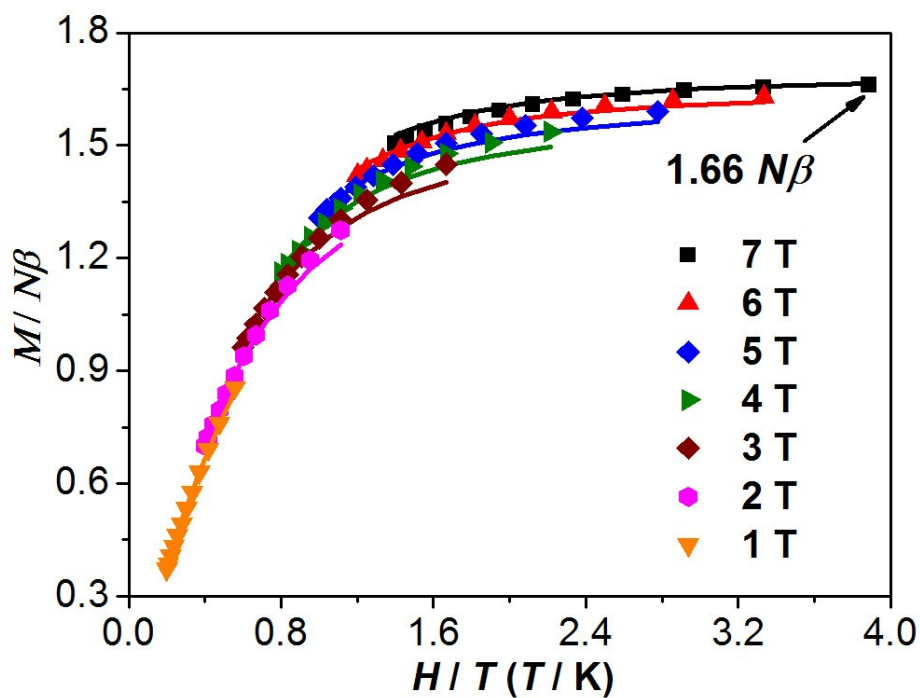

**Fig. S17** Low-temperature magnetization data for **2L** collected under various applied dc fields. The solid lines represent fits to the data.

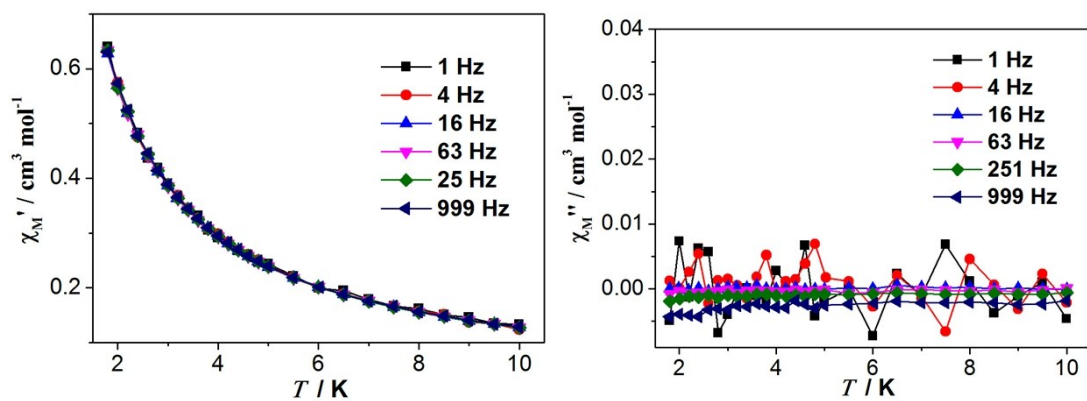

**Fig. S18** Temperature dependence of ac susceptibilities of in-phase  $\chi_M'$  (left) and out-of-phase  $\chi_M''$  (right) for **2** under zero applied static field.

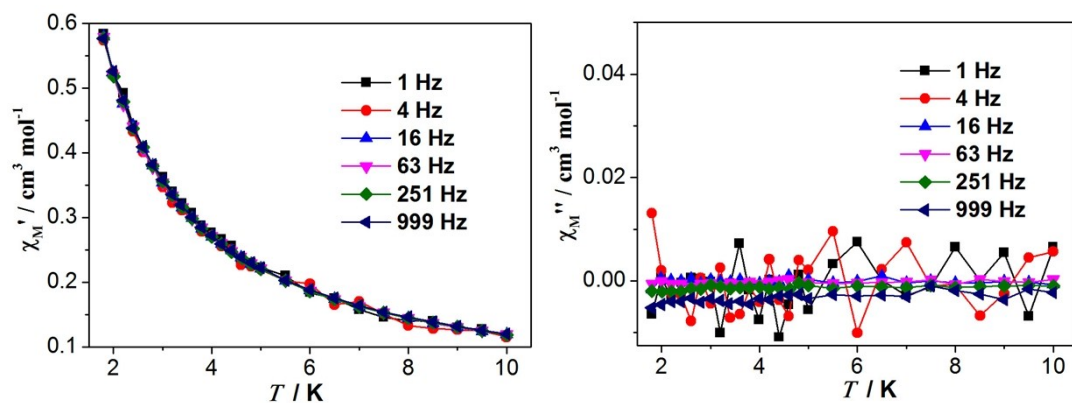

**Fig. S19** Temperature dependence of ac susceptibilities of in-phase  $\chi_M'$  (left) and out-of-phase  $\chi_M''$  (right) for **2L** under zero applied static field.

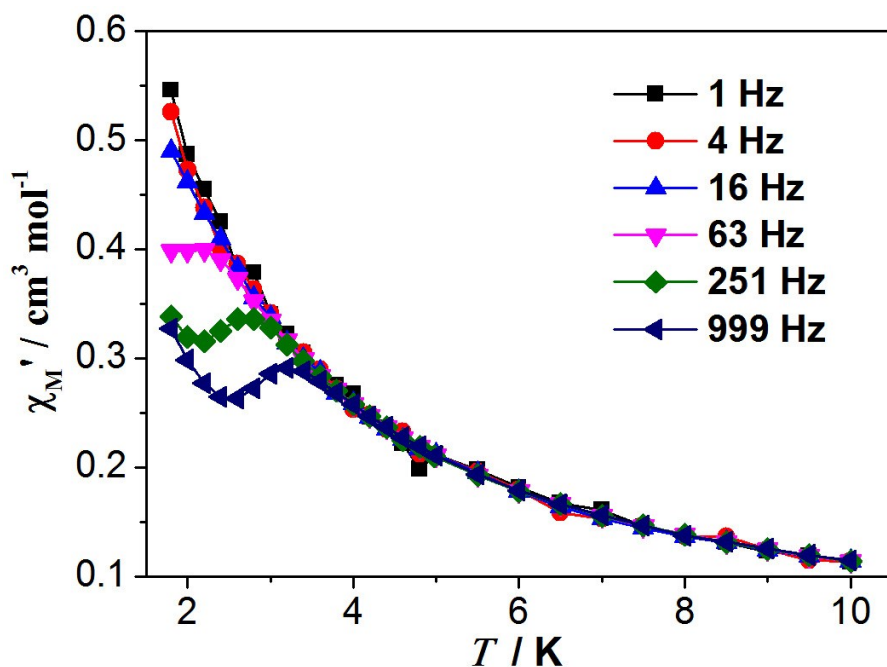

**Fig. S20** Temperature dependence of ac susceptibilities of in-phase  $\chi_M'$  for **2** under 1000 Oe applied static field.

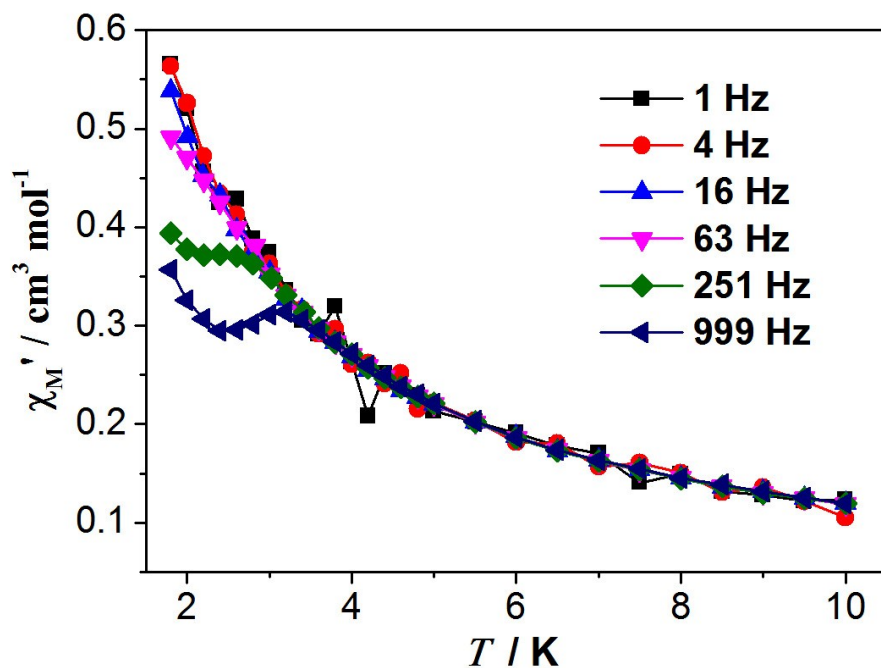

**Fig. S21** Temperature dependence of ac susceptibilities of in-phase  $\chi_M'$  for **2L** under 1000 Oe applied static field.

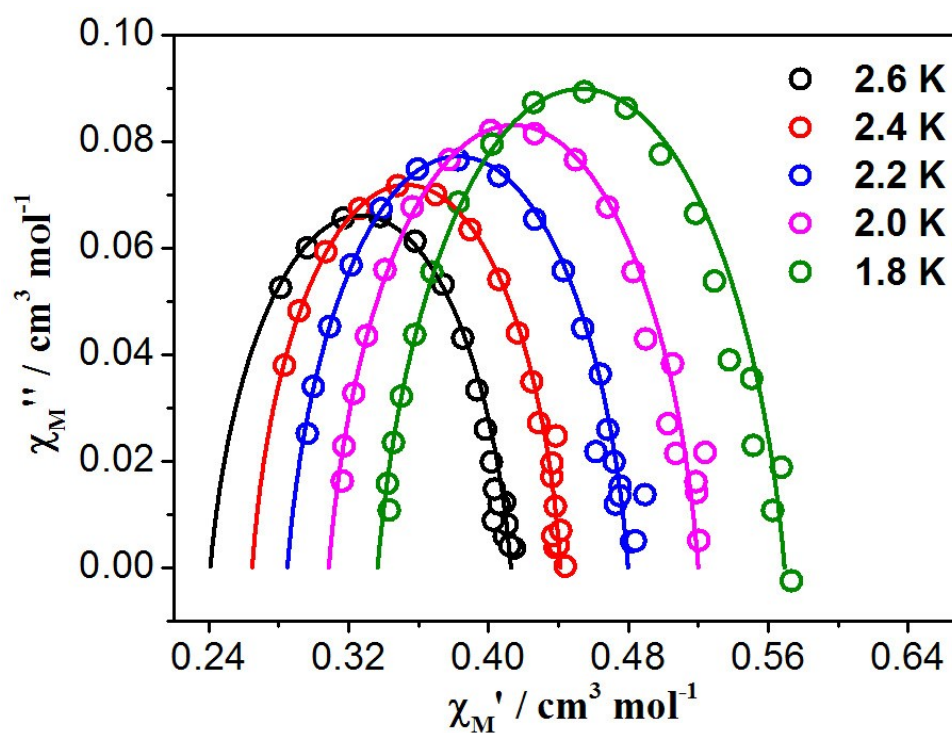

**Fig. S22** Cole-Cole plots of **2** in the temperature range of 1.8-2.6 K under applied static field of 1000 Oe; the solid lines are the best fit by Debye model ( $\alpha < 0.17$ ).

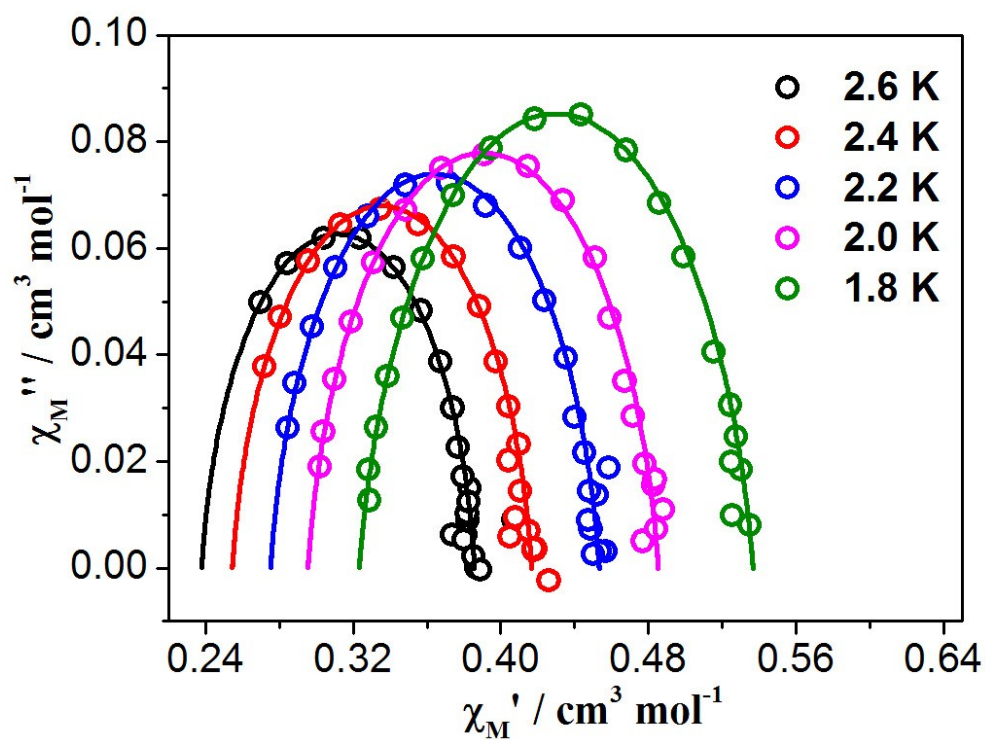

**Fig. S23** Cole-Cole plots of **2L** in the temperature range of 1.8-2.6 K under applied static field of 1000 Oe; the solid lines are the best fit by Debye model ( $\alpha < 0.14$ ).
